1 ***ESTIMATION OF COVID-19 CASES IN FRANCE AND IN DIFFERENT COUNTRIES:***  
2 ***HOMOGENEISATION BASED ON MORTALITY***

3 *Marc DHENAIN*

4  
5 (1) Académie Vétérinaire de France, 34, rue Bréguet, 75011 Paris, France

6 (2) Académie Nationale de Médecine, 16 rue Bonaparte, 75006 Paris, France

7 (3) Centre National de la Recherche Scientifique (CNRS), Université Paris-Sud, Université Paris-Saclay UMR  
8 9199, Laboratoire des Maladies Neurodégénératives, 18 Route du Panorama, F-92265 Fontenay-aux-Roses,  
9 France.

10 (4) Commissariat à l’Energie Atomique et aux Energies Alternatives (CEA), Institut François Jacob, Molecular  
11 Imaging Research Center (MIRCent), 18 Route du Panorama, F-92265 Fontenay-aux-Roses, France.

12  
13 **Correspondance**

14 Marc Dhenain

15 MIRCent, UMR CEA-CNRS 9199, 18 Route du Panorama, 92 265 Fontenay-aux-Roses CEDEX, France

16 Tel: +33 1 46 54 81 92; Fax: +33 1 46 54 84 51; email: Marc.Dhenain@cea.fr

17  
18  
19 ***Abstract:***

20 *Every day the authorities of different countries provide an estimate of the number of persons*  
21 *affected by Covid-19 and a count of mortality. We propose to use the mortality reported in*  
22 *each country to provide a better estimate ( $C_{t_0\text{-estimated}}$ ) of the number of cases at a given time*  
23  *$t_0$ .*

$$24 \quad C_{t_0\text{-estimated}} = (M_{t_0} / M_{r\text{-est}}) * (C_{t_0} / C_{t_0-18d})$$

25 *With  $M_{t_0}$ : number of deaths reported in a country at time  $t_0$ ;  $M_{r\text{-est}}$ : estimated mortality rate;*  
26  *$C_{t_0}$ : number of cases reported in a country at time  $t_0$ ;  $C_{t_0-18d}$ : number of cases reported in the*  
27 *country at time  $t_0$  minus 18 days.*

28 *Based on this index and an estimated mortality rate of 2%, we assessed the number of cases*  
29 *April 2, 2020 in Belgium, China, France, Germany, Iran, Italy, South Korea, Netherlands,*  
30 *Spain, United Kingdom and USA. This number reaches 3,538,549 in France and 809,896*  
31 *persons in Germany. The proposed formula also makes it possible to evaluate the impact of*  
32 *policies to prevent the spread of epidemic on the appearance of new cases.*

33  
34 ***Key-Words: Covid-19, Estimated number of cases, Mortality, Prevalence***

35  
36  
37 A French version of this article is “in press” as

38 **Dhenain Marc, Estimation du nombre de cas de Covid-19 en France et dans différents pays :**  
39 **homogénéisation basée sur la mortalité, Bulletin de l’Académie Vétérinaire de France, 2020 (in press),**  
40 **<https://academie-veterinaire-defrance.org/bavf-coronavirus/>**

NOTE: This preprint reports new research that has not been certified by peer review and should not be used to guide clinical practice.

## 1 INTRODUCTION

2 The Sars-CoV-2 coronavirus infection that causes Covid-19 has spread worldwide leading to  
3 significant deaths (European Center for Disease Prevention and Control 2020). Every day the  
4 authorities of different countries provide and distribute worldwide an estimate of the number  
5 of affected persons and a count of mortality (Dong et al. 2020,  
6 [https://github.com/CSSEGISandData/COVID-19/tree/master/csse\\_covid\\_19\\_data/csse\\_covid\\_19\\_time\\_series](https://github.com/CSSEGISandData/COVID-19/tree/master/csse_covid_19_data/csse_covid_19_time_series)).  
7 Knowing the number of affected subjects is critical for implementing strategies to protect  
8 populations and for ending the crisis. Figures reported by different countries reveal strong  
9 differences and only partly reflects the reality (Table I). For example, the day their death toll  
10 approached 3,000 people, France had approximately 45,000 people affected versus 80,537 for  
11 China. Germany reported only 1,107 deaths when 84,794 people were affected. Calculating  
12 the case fatality rate (CFR) or mortality rate ( $M_r$ ) on a given day ( $t_0$ ) is another way to  
13 objectify differences between countries. At first sight,

$$14 \quad M_r = M_{t_0} / C_{t_0}$$

15 With  $M_{t_0}$  = number of deaths reported on day  $t_0$ ;  $C_{t_0}$  = number of cases reported on day  $t_0$ .  
16 The day when the death toll of different countries was the closest to 3,000 people, three  
17 countries (Germany, South Korea, and the United States) had mortality rates close to 1.6%;  
18 seven countries (Belgium, France, Iran, Italy, the Netherlands, Spain, and the United  
19 Kingdom) had rates between 6% and 9.1%, and China had an intermediate value of 3.7%  
20 (Table I).

21 How to assess more precisely the number of people affected using a similar method for  
22 different countries? We offer a simple method using the number of deaths reported by each  
23 country to estimate and compare the actual rate of people affected by Covid-19. This method  
24 relies on four assumptions: 1. The number of deaths reported by each country is reliable; 2.  
25 The mortality rate ( $M_r$ ) is known and similar in different countries; 3. The average time  
26 between the onset of symptoms and death is known; 4. The time-dependent increase in the  
27 number of cases reported in databases during the average time between the onset of symptoms  
28 and death reflects the time-dependent increase in the actual number of cases during the same  
29 time-period.

30

## 31 METHODS

32 Patients who die on any given day were infected much earlier, and thus the denominator of  
33 the mortality rate should be the total number of patients infected at the same time as those  
34 who died (Baud et al. 2020). This is particularly true as the rates of evolution of the pandemic

1 evolve differently in various countries: in March 2020, the number of people affected  
2 increased sharply from day to day in France, while it was stable in China.

3 A better estimate of mortality rate is thus:

$$4 \quad M_{r-x\text{day}} = M_{t0} / C_{t0-x\text{days}}$$

5 With  $C_{t0-x\text{days}}$  = number of cases reported on day  $t_0$  minus  $x$  days, with  $x$  = average time-  
6 period from onset of symptoms to death.

7 An average duration of 18 days is reported between the onset of symptoms and the death of  
8 Covid-19 patients (Ruan et al. 2020; Verity et al. 2020; Zhou et al. 2020). We can therefore  
9 calculate an adjusted mortality rate ( $M_{r-18}$ ) by taking into account this average delay of 18  
10 days (Flaxman et al. 2020).

$$11 \quad M_{r-18} = M_{t0} / C_{t0-18d} \quad (\text{Table I})$$

12 With  $C_{t0-18d}$  = number of cases reported on day  $t_0$  minus 18 days. The calculation of  $M_{r-18}$   
13 reveals widening gaps between countries compared to  $M_r$  with variations ranging from 2.1%  
14 (South Korea) to more than 700% for Spain. When comparing  $M_{t0}$  and  $C_{t0-18d}$  in different  
15 countries (Fig. 1), we see a linear relationship between mortality at  $t_0$  and the number of cases  
16 at  $t_0-18\text{days}$  for most countries (except China and South Korea). The slope of this relationship  
17 varies widely between countries, which is consistent with variable  $M_{r-18}$ . The values of  $M_{r-18}$   
18 based on the cases reported by the different countries are therefore unreliable. Several highly  
19 controlled international studies (residents of mainland China, travelers returning from  
20 mainland China, repatriated from China, passengers on the *Diamond-Princess* cruise ship)  
21 reported  $M_{r-18}$  of 0.7 to 3.6% (Verity et al. 2020). Based on this last study, an estimated  
22 mortality rate can be proposed  $M_{r-\text{est}} = 2\%$ .

23 By knowing the number of deaths on day  $t_0$ , we can therefore estimate the number of cases  
24 ( $C_{(\text{est}-18d)}$ ) eighteen days before:

$$25 \quad C_{(\text{est}-18d)} = M_{t0} / M_{r-\text{est}}$$

26 The increase in the number of reported cases over the past eighteen days (“progression rate”:  
27  $P_{18d}$ ) is known in each country. It is equal to:

$$28 \quad P_{18d} = C_{t0} / C_{t-18d}$$

29 If we assume that this progression rate reflects the time-dependent increase in the actual  
30 number of cases during the same time-period, then the number of cases estimated at  $t_0$  in each  
31 country is:

$$32 \quad C_{t0-\text{estimated}} = C_{(\text{est}-18d)} * P_{18d} \quad (\text{Table II})$$

33

34 **RESULTS**

1 Using the previous equation and international databases (Dong et al. 2020,  
2 [https://github.com/CSSEGISandData/COVID-19/tree/master/csse\\_covid\\_19\\_data/csse\\_covid\\_19\\_time\\_series](https://github.com/CSSEGISandData/COVID-19/tree/master/csse_covid_19_data/csse_covid_19_time_series)),  
3 we estimated the number of people currently or previously affected by Covid-19 on April 2<sup>nd</sup>  
4 2020 in different countries (Table II). This estimation was 3,538,549 in France, 809,896 in  
5 Germany, 7,435,552 in Spain, 4,319,749 in the United Kingdom and 20,615,926 in the United  
6 States.

7 This analysis was based on  $M_{r-est} = 2\%$ . The estimated number of cases must be halved if the  
8 mortality rate used drops from 2 to 4% (Table III). It must be doubled if the mortality rate  
9 used goes from 2 to 1%. Note that some authors suggest that the real mortality rate for Covid-  
10 19 could be 5.6 to 15.6% (Baud et al. 2020), which is much higher values than those we used.  
11 If the calculation uses a mortality rate of 15%, then the estimated number of cases drops to  
12 471,807 for France, but it becomes lower than the number of cases actually reported for China  
13 or South Korea, which is not consistent (Table III).

14 In our study, we set the delay between the onset of symptoms and death at 18 days based on  
15 robust data from the literature (Ruan et al. 2020; Verity et al. 2020; Zhou et al. 2020) and  
16 delays used in other models (Flaxman et al. 2020). Lowering this delay, for example to 12  
17 days, sharply decreases the number of estimated cases (*e.g.* 1,114,685 for France (Table III))  
18 although it remains high compared to figures reported in databases.

19 Interestingly, since  $C_{t_0-estimated} = C_{(est-18d)} * P_{18d}$ , this model takes into account the progression of  
20 the number of cases reported during the last eighteen days ( $P_{18d}$ ). It can thus be used to model  
21 how policies to prevent disease spreading modulates  $P_{18d}$ , in order to understand the impact of  
22 these policies on the appearance of new cases. For example, for France on April 2,  $P_{18d} = 13.14$ ,  
23 while on March 26, 2020, when regulation of progression rate based on population containment  
24 was still not fully efficient,  $P_{18d} = 25.89$ . We can therefore estimate that the containment made  
25 it possible to reduce  $P_{18d}$  from 25.89 to 13.14. The number of cases estimated on April 2 using  
26  $P_{18d} = 25.89$  would have been 6,974,156 cases. Thus, the containment from March 26 to April  
27 2 prevented the appearance of 3,435,607 new cases in France, as well as associated fatalities.

28

## 29 **DISCUSSION**

30 Evaluating the number of Covid-19 cases present in a country is critical to predict the end of  
31 the crisis or containment. We offer a simple method to estimate the number of people affected  
32 by Covid-19 at a time  $t_0$  in a country, using the equation

$$33 \quad C_{t_0-estimated} = (M_{t_0} / M_{r-est}) * (C_{t_0} / C_{t_0-18d})$$

34

1 With  $M_{t_0}$ : number of deaths reported in a country at time  $t_0$ ;  $M_{r-est}$ : estimated mortality rate;  $C_{t_0}$ :  
2 number of cases reported in a country at time  $t_0$ ;  $C_{t_0-18d}$ : number of cases reported in the country  
3 at time  $t_0$  minus 18 days. This analysis is based on four assumptions: 1. The number of deaths  
4 reported by each country is reliable, 2. The estimated mortality rate among people affected is  
5 known ( $M_{r-est}$ , here considered as 2%), 3. The average time between the onset of symptoms and  
6 death is known (here considered 18 days). 4. The time-dependent increase in the number of  
7 cases reported in databases during average time between the onset of symptoms and death  
8 reflects the time-dependent increase in the actual number of cases during the same time-period.  
9 Our analysis suggests that the number of Covid-19 cases in several country greatly exceeds the  
10 number of cases presented in international databases (3,538,549 versus 59,105 for France on  
11 April 2, 2020). These very high figures are consistent with those evaluated with another method  
12 by (Flaxman et al. 2020). For example, we report 7.4 million cases in Spain while Flaxman  
13 reports 7.0 million. Our calculation relies on a relatively simple method while that of Flaxman  
14 et al. uses more complex analyzes (hierarchical semi-mechanistic Bayesian model). Our model  
15 used a mortality rate of 2% while several strongly controlled international studies reported rates  
16 of 0.7 to 3.6% (Verity et al. 2020). Values from 0.5 to 4% could thus be other reasonable options  
17 to estimate mortality rate. One of the limitations of our model is that mortality rates can change  
18 from one country to another, for example depending on the distribution of the population in  
19 different age groups that have different sensitivities to Covid-19.  
20 Note that our analysis relies solely on the number of deceased people with confirmed cases of  
21 Covid-19 and misses deaths not reported as Covid-19-related. Finally, note that to know the  
22 number of actual cases in a country at a given time, we must subtract from the estimates  
23 presented here the number of people healed, including those whose disease has not been  
24 identified.

25

## 26 REFERENCES

27 Baud D, Qi X, Nielsen-Saines K, Musso D, Pomar L, Favre G. Real estimates of mortality  
28 following COVID-19 infection [published online ahead of print, 2020 Feb 19]. *Lancet Infect*  
29 *Dis.* 2020. doi: 10.1016/S1473-3099(20)30195-X.

30

31 Dong E, Du H, Gardner L. An interactive web-based dashboard to track COVID-19 in real  
32 time [published online ahead of print, 2020 Feb 19]. *Lancet Infect Dis.* 2020;S1473-  
33 3099(20)30120-1. doi:10.1016/S1473-3099(20)30120-1. Database available on:

34 [https://github.com/CSSEGISandData/COVID-19/tree/master/csse\\_covid\\_19\\_data/csse\\_covid\\_19\\_time\\_series](https://github.com/CSSEGISandData/COVID-19/tree/master/csse_covid_19_data/csse_covid_19_time_series)

1 Consulted 2020/04/04

2

3 Flaxman S, Mishra S, Gandy A, Unwin JT, Coupland H, Mellan TA et al. 2020. Estimating  
4 the number of infections and the impact of nonpharmaceutical interventions on COVID-19 in  
5 11 European countries. Imperial College London (30-03-2020). doi: 10.25561/77731

6

7 European Centre for Disease Prevention and Control. Situation Update-Worldwide.

8 Disponible à: <https://www.ecdc.europa.eu/en/geographical-distribution-2019-ncov-cases>.

9 Consulted 2020/04/04

10

11 Ruan Q, Yang K, Wang W, Jiang L, Song J. Clinical predictors of mortality due to COVID-  
12 19 based on an analysis of data of 150 patients from Wuhan, China [published online ahead of  
13 print, 2020 Mar 3]. Intensive Care Med. 2020;1–3. doi:10.1007/s00134-020-05991-x

14

15 Verity R, Okell LC, Dorigatti I, Winskill P, Whittaker C, Imai N et al. Estimates of the  
16 severity of coronavirus disease 2019: a model-based analysis [published online ahead of print,  
17 2020 Mar 30]. Lancet Infect Dis. 2020;S1473-3099(20)30243-7. doi:10.1016/S1473-  
18 3099(20)30243-7

19

20 Zhou F, Yu T, Du R, Fan G, Liu Y, Liu Z et al. Clinical course and risk factors for mortality  
21 of adult in patients with COVID-19 in Wuhan, China: a retrospective cohort study. Lancet.  
22 2020 ; 395: 1054-1062. doi: 10.1016/S0140-6736(20)30566-3

1 **FIGURE AND TABLES**

2

| Country        | Day<br>( $t_0$ ) | Deaths<br>at $t_0$<br>( $M_{t_0}$ ) | Cases<br>at $t_0$<br>( $C_{t_0}$ ) | Mortality<br>rate<br>$M_r$ | Cases<br>at $t_0-18j$<br>( $C_{t_0-18d}$ ) | Mortality<br>rate<br>$M_{r-18d}$ |
|----------------|------------------|-------------------------------------|------------------------------------|----------------------------|--------------------------------------------|----------------------------------|
| Belgium        | April 2          | 1 011                               | 15 348                             | 6.6%                       | 886                                        | 114.1%                           |
| China          | March 5          | 3 015                               | 80 537                             | 3.7%                       | 70 513                                     | 4.3%                             |
| France         | March 30         | 3 024                               | 44 550                             | 6.8%                       | 2 281                                      | 132.6%                           |
| Germany        | April 2          | 1 107                               | 84 794                             | 1.3%                       | 5 795                                      | 19.1%                            |
| Iran           | April 1          | 3 036                               | 47 593                             | 6.4%                       | 12 729                                     | 23.9%                            |
| Italy          | March 18         | 2 978                               | 35 713                             | 8.3%                       | 1 128                                      | 264.0%                           |
| South-Korea    | April 2          | 169                                 | 9 976                              | 1.7%                       | 8 162                                      | 2.1%                             |
| Netherlands    | April 2          | 1 339                               | 14 697                             | 9.1%                       | 1 135                                      | 118.0%                           |
| Spain          | March 24         | 2 808                               | 39 885                             | 7.0%                       | 400                                        | 702.0%                           |
| United Kingdom | April 2          | 2 921                               | 33 718                             | 8.6%                       | 1 140                                      | 256.2%                           |
| USA            | March 30         | 2 978                               | 161 807                            | 1.8%                       | 1 163                                      | 256.1%                           |

3

4 *Table I: Mortality rates in different countries when the number of deaths approached 3,000*  
5 *people (or the last figure available when the 3,000 deaths were not reached April 2<sup>nd</sup> 2020).*

6 ([https://github.com/CSSEGISandData/COVID-19/tree/master/csse\\_covid\\_19\\_data/csse\\_covid\\_19\\_time\\_series](https://github.com/CSSEGISandData/COVID-19/tree/master/csse_covid_19_data/csse_covid_19_time_series))

1

| Country        | Deaths at $t_0$ (April 2) ( $M_{t_0}$ ) | Estimated cases at $t_0-18d$ ( $C_{(est-18d)}$ ) | Reported cases at $t_0-18d$ ( $C_{t_0-18d}$ ) | Reported cases at $t_0$ ( $C_{t_0}$ ) | Progression rate from $t_{-18}$ to $t_0$ $P_{18d}$ | Estimated Cases (April 2) $C_{t_0-estimated}$ |
|----------------|-----------------------------------------|--------------------------------------------------|-----------------------------------------------|---------------------------------------|----------------------------------------------------|-----------------------------------------------|
| Belgium        | 1 011                                   | 50 550                                           | 886                                           | 15 348                                | 17.32                                              | <b>875 667</b>                                |
| China          | 3 322                                   | 166 100                                          | 81 303                                        | 82 432                                | 1.02                                               | <b>169 030</b>                                |
| France         | 5 387                                   | 269 350                                          | 4 499                                         | 59 105                                | 13.14                                              | <b>3 538 549</b>                              |
| Germany        | 1 107                                   | 55 350                                           | 5 795                                         | 84 794                                | 14.63                                              | <b>809 896</b>                                |
| Iran           | 3 160                                   | 158 000                                          | 13 938                                        | 50 468                                | 3.62                                               | <b>572 101</b>                                |
| Italy          | 13 915                                  | 695 750                                          | 24 747                                        | 115 242                               | 4.66                                               | <b>3 239 973</b>                              |
| South-Korea    | 169                                     | 8 450                                            | 8 162                                         | 9 976                                 | 1.22                                               | <b>10 328</b>                                 |
| Netherlands    | 1 339                                   | 66 950                                           | 1 135                                         | 14 697                                | 12.95                                              | <b>866 929</b>                                |
| Spain          | 10 348                                  | 517 400                                          | 7 798                                         | 112 065                               | 14.37                                              | <b>7 435 552</b>                              |
| United Kingdom | 2 921                                   | 146 050                                          | 1 140                                         | 33 718                                | 29.58                                              | <b>4 319 749</b>                              |
| USA            | 5 926                                   | 296 300                                          | 3 499                                         | 243 453                               | 69.58                                              | <b>20 615 926</b>                             |

2

3 *Table II: Estimation of the number of cases in different countries April 2<sup>nd</sup> ( $t_0$ ) using a delay of 18 days*  
4 *between symptom occurrence and death and an estimated mortality rate ( $M_{r-est}$ ) of 2% (note that*  
5 *rounding was not carried out during the calculation of  $C_{t_0-estimated}$  presented in the last column. This*  
6 *explains that the presented values are slightly different from the values of  $C_{(est-18d)} * P_{18d}$ ).*



| Country               | Population (million) | Reported cases at $t_0$ (April 2) ( $C_{t_0}$ ) | Progression rate $t_{-18}$ to $t_0$ $P_{18d}$ | Estimated cases (April 2) $C_{t_0}$ -estimated | Estimated cases (April 2) $C_{t_0}$ -estimated | Estimated cases (April 2) $C_{t_0}$ -estimated | Progression rate $t_{-12}$ to $t_0$ $P_{12d}$ | Estimated cases (April 2) $C_{t_0}$ -estimated |
|-----------------------|----------------------|-------------------------------------------------|-----------------------------------------------|------------------------------------------------|------------------------------------------------|------------------------------------------------|-----------------------------------------------|------------------------------------------------|
| Delay                 |                      |                                                 |                                               | $t_{0-18d}$                                    | $t_{0-18d}$                                    | $t_{0-18d}$                                    |                                               | $t_{0-12d}$                                    |
| $M_{r-est}$           |                      |                                                 |                                               | 2%                                             | 4%                                             | 15%                                            |                                               | 2%                                             |
| <b>Belgium</b>        | 11,476               | 15 348                                          | 17.32                                         | <b>875 667</b>                                 | <b>437 834</b>                                 | <b>116 756</b>                                 | 5.45                                          | <b>275 610</b>                                 |
| <b>China</b>          | 1,384,688            | 82 432                                          | 1.02                                          | <b>169 030</b>                                 | <b>84 515</b>                                  | <b>22 537</b>                                  | 1.01                                          | <b>168 402</b>                                 |
| <b>France</b>         | 67,795               | 59 105                                          | 13.14                                         | <b>3 538 549</b>                               | <b>1 769 275</b>                               | <b>471 807</b>                                 | 4.14                                          | <b>1 114 685</b>                               |
| <b>Germany</b>        | 83,073               | 84 794                                          | 14.63                                         | <b>809 896</b>                                 | <b>404 948</b>                                 | <b>107 986</b>                                 | 3.82                                          | <b>211 288</b>                                 |
| <b>Iran</b>           | 82,022               | 50 468                                          | 3.62                                          | <b>572 101</b>                                 | <b>286 051</b>                                 | <b>76 280</b>                                  | 2.45                                          | <b>386 897</b>                                 |
| <b>Italy</b>          | 60,360               | 11 5242                                         | 4.66                                          | <b>3 239 973</b>                               | <b>1 619 987</b>                               | <b>431 996</b>                                 | 2.15                                          | <b>1 496 503</b>                               |
| <b>South-Korea</b>    | 51,709               | 9 976                                           | 1.22                                          | <b>10 328</b>                                  | <b>5 164</b>                                   | <b>1 377</b>                                   | 1.13                                          | <b>9580</b>                                    |
| <b>Netherlands</b>    | 17,282               | 14 697                                          | 12.95                                         | <b>866 929</b>                                 | <b>433 465</b>                                 | <b>115 591</b>                                 | 4.05                                          | <b>270 990</b>                                 |
| <b>Spain</b>          | 46,935               | 112 065                                         | 14.37                                         | <b>7 435 552</b>                               | <b>3 717 776</b>                               | <b>991 407</b>                                 | 4.42                                          | <b>2 285 112</b>                               |
| <b>United Kingdom</b> | 65,761               | 33 718                                          | 29.58                                         | <b>4 319 749</b>                               | <b>2 159 875</b>                               | <b>575 967</b>                                 | 6.72                                          | <b>981 370</b>                                 |
| <b>USA</b>            | 328,240              | 24 3453                                         | 69.58                                         | <b>20 615 926</b>                              | <b>10 307 963</b>                              | <b>2 748 790</b>                               | 9.55                                          | <b>2 830 049</b>                               |

1  
2 *Table III: Estimation of the number of cases in different countries April 2<sup>nd</sup> 2020 ( $t_0$ ) using estimated*  
3 *mortality rate ( $M_{r-est}$ ) from 2 to 15% and delays between symptom occurrence and death of 18 and*  
4 *12 days.*

1

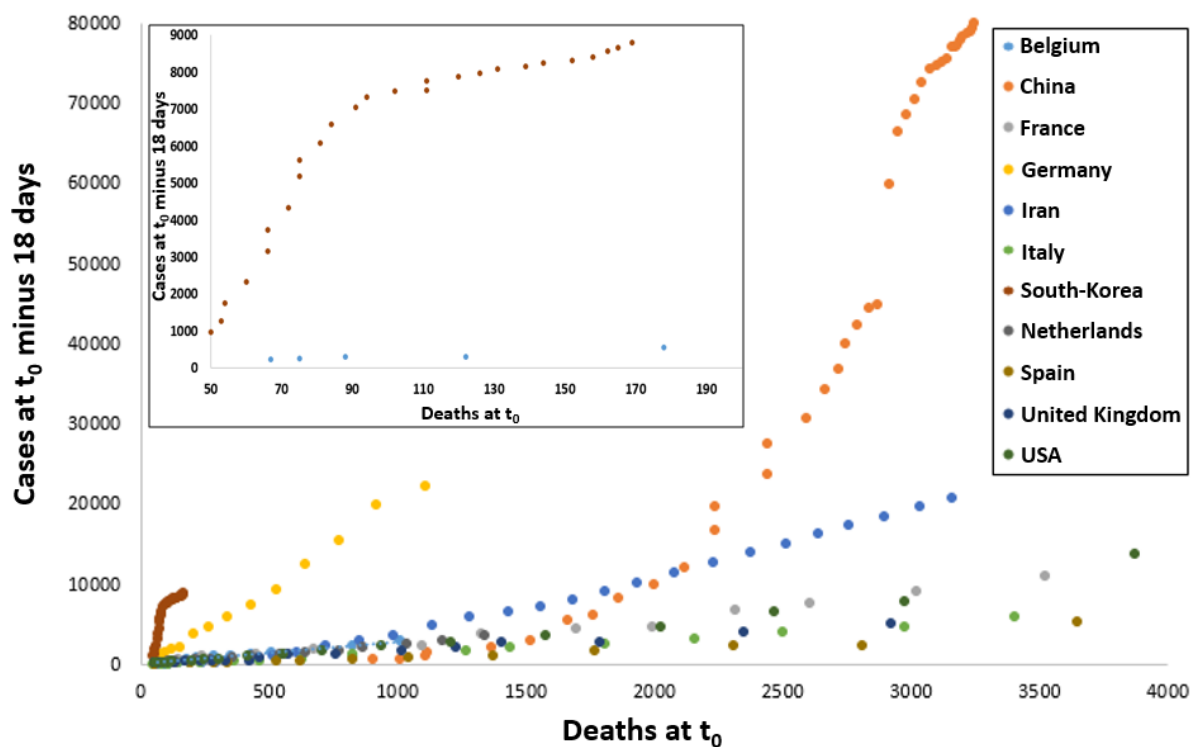

2

3 *Figure 1: Relationships between deaths a given day ( $t_0$ ) and the number of cases eighteen*  
4 *days before ( $t_0-18days$ ) in different countries. The data include only figures between 50 and 4*  
5 *000 deaths (or less if the number of deaths was lower in the country). The internal frame*  
6 *shows data from South Korea and Belgium that presented with less deaths than other*  
7 *countries.*
